# Supplementary material for: A Combination of Atorvastatin and Aspirin Enhances the Pro-Regenerative Interactions of Marrow Stromal Cells and Stroke-Derived Monocytes In Vitro
Source: PubMed Central journal article supplement (PMC8093790; doi:10.3389/fphar.2021.589418), 2021-04-20
Supplement: datasheet1.pdf [file datasheet1.pdf]

# Supplementary Material

## **A Combination of Atorvastatin and Aspirin enhances the pro-regenerative interactions of marrow stromal cells and stroke-derived monocytes *in vitro***

Nikunj Satani<sup>1#</sup>, Xu Zhang<sup>2</sup>, Kaavya Giridhar<sup>1</sup>, Natalia Wewior<sup>1</sup>, Chunyan Cai<sup>2</sup>, Jaroslaw Aronowski<sup>1</sup>, Sean I. Savitz<sup>1</sup>

<sup>1</sup>Institute for Stroke and Cerebrovascular Diseases, McGovern Medical School at UTHealth, Houston, Texas, USA

<sup>2</sup>Center for Clinical and Translational Sciences, McGovern Medical School at UTHealth, Houston, Texas, USA

### **#Corresponding Author:**

Nikunj Satani, MD, MPH

Institute of Stroke and Cerebrovascular Diseases

McGovern Medical School at UTHealth

6431 Fannin Street, MSB 7.628, Houston TX 77030

Phone: 713-500-5512

Email: [Nikunj.B.Satani@uth.tmc.edu](mailto:Nikunj.B.Satani@uth.tmc.edu)

**Figure S1.** Clinically relevant concentrations of Atorvastatin does not alter cell proliferation of MSCs at physiological concentrations. MTT assay was performed after 24 and 48 hours of exposure to Atorvastatin. Absorbance was measured at 595nm. Data is normalized with vehicle control (Dose 0).

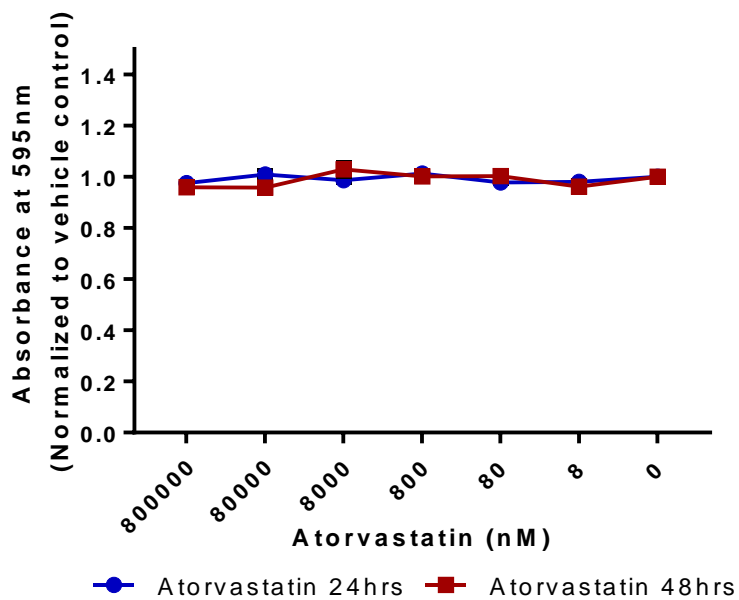

**Figure S2.** Atorvastatin does not change the cytokine secretions of IL-4 and VEGF from co-cultures of stroke patient monocytes with MSCs after 24 hours of exposure.

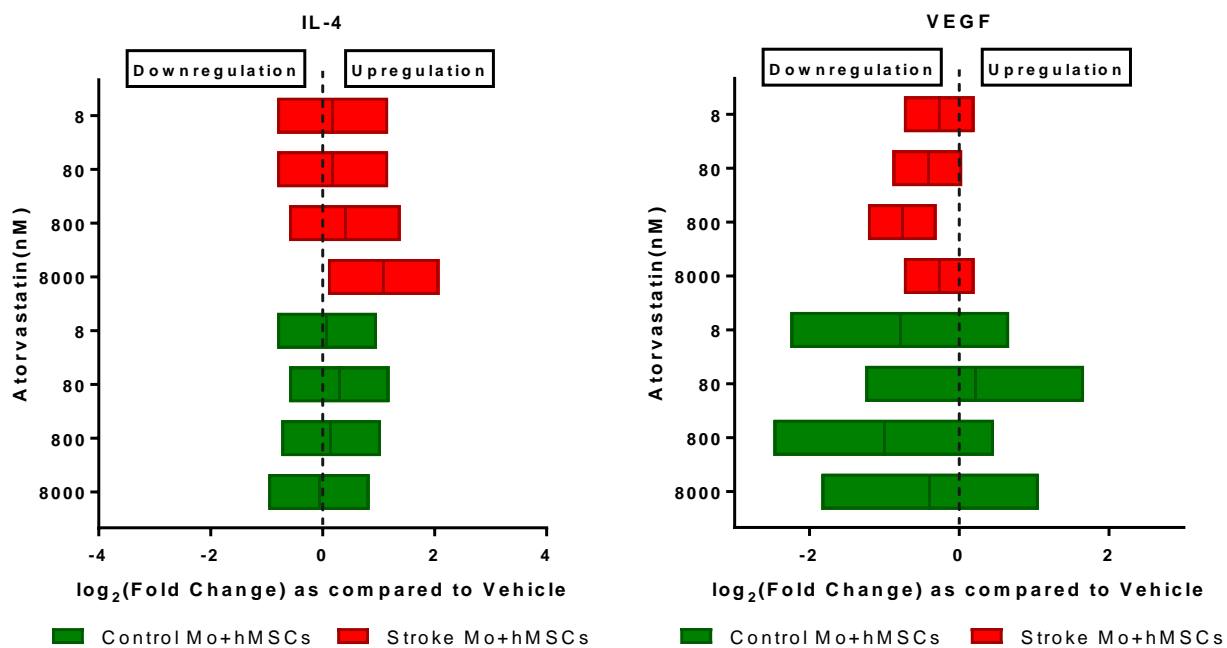

**Table S1.** National Institute of Health Stroke Scale (NIHSS) for the stroke patients from where the peripheral blood monocytes were collected.

| <b>Enrolled Stroke Patient from where peripheral blood monocytes were isolated</b> | <b>Diagnosis at discharge</b> | <b>NIHSS at admission</b> |
|------------------------------------------------------------------------------------|-------------------------------|---------------------------|
| Stroke patient #1 (Monocytes #1)                                                   | Acute Ischemic Stroke         | 11                        |
| Stroke patient #2 (Monocytes #2)                                                   | Acute Ischemic Stroke         | 12                        |
| Stroke patient #3 (Monocytes #3)                                                   | Acute Ischemic Stroke         | 15                        |

**Table S2.** Normal plasma levels in a healthy subject for all cytokines measured. *ND = not detectable*

| <b>Cytokine</b> | <b>Normal levels (pg/ml)</b> |
|-----------------|------------------------------|
| IL-1 $\beta$    | 0.5 - 12.0                   |
| IL-4            | ND - 1.5                     |
| IL-6            | 0.5 - 5.0                    |
| IL-8            | 24.4 - 35.9                  |
| MCP-1           | 20.1 - 78.9                  |
| IL-1RA          | 101.2 - 172.0                |
| TNF- $\alpha$   | ND - 8.1                     |
